# Supplementary material for: Escherichia coli redox mutants as microbial cell factories for the synthesis of reduced biochemicals
Source: PubMed Central journal article supplement (PMC3962086; doi:10.5936/csbj.201210019), 2013-01-18
Supplement: CSBJ-3-e201210019_SM0001.pdf [file CSBJ-3-e201210019_SM0001.pdf]

**Table S1.** Genes of *E. coli* encoding metabolic-related functions regulated by the ArcBA and CreBC two-component systems. Data were compiled from Lynch and Lin [1] and Salmon et al. [2], and the specific references cited below.

| ArcBA system      |                                                                                                                                                                                                 |            |         |
|-------------------|-------------------------------------------------------------------------------------------------------------------------------------------------------------------------------------------------|------------|---------|
| Gene(s)           | Function(s)                                                                                                                                                                                     | Regulation | Ref.    |
| <i>aceBA</i>      | Isocitrate lyase (AceA); catalyzes the cleavage of isocitrate or the condensation of glyoxylate and succinate. Malate synthase A (AceB); converts acetyl-CoA and glyoxylate into malate and CoA | –          | [3]     |
| <i>acnA, acnB</i> | Aconitase; catalyzes the reversible isomerization of citrate and iso-citrate via <i>cis</i> -aconitate in the TCA cycle                                                                         | –          | [4]     |
| <i>cydAB</i>      | Cytochrome <i>d</i> oxidase; catalyzes the oxidation of ubiquinol-8 during oxic respiration as O <sub>2</sub> becomes limiting                                                                  | +          | [5,6]   |
| <i>cyoABCDE</i>   | Cytochrome <i>o</i> oxidase; catalyzes the oxidation of ubiquinol-8 during oxic respiration under O <sub>2</sub> -rich growth conditions                                                        | –          | [5]     |
| <i>fumAC</i>      | Fumarase; interconverts fumarate and L-malate in the TCA cycle, and participates in the reductive pathway from oxaloacetate to succinate during anoxic growth                                   | +          | [7]     |
| <i>glcDEF</i>     | Glycolate oxidase; converts glycolate into glyoxylate in the glyoxylate shunt                                                                                                                   | –          | [6]     |
| <i>glfA</i>       | Citrate synthase; catalyzes the condensation of acetyl-CoA and oxaloacetate to form citrate                                                                                                     | –          | [8]     |
| <i>icd</i>        | Isocitrate dehydrogenase; catalyzes the conversion of isocitrate to $\alpha$ -ketoglutarate, thereby forming NADH and CO <sub>2</sub>                                                           | –          | [6]     |
| <i>lldPRD</i>     | L-Lactate permease, regulator, and dehydrogenase, which interconvert pyruvate and L-lactate                                                                                                     | –          | [6]     |
| <i>lpdA</i>       | Lipoamide dehydrogenase; a component of the pyruvate dehydrogenase complex, $\alpha$ -ketoglutarate dehydrogenase, and the glycine-cleavage multi-enzyme systems                                | –          | [9]     |
| <i>mdh</i>        | Malate dehydrogenase; catalyzes the reversible oxidation of malate to oxaloacetate, thereby forming NADH                                                                                        | –          | [6]     |
| <i>ndh</i>        | Respiratory NADH dehydrogenase II; a membrane-bound (but non-H <sup>+</sup> -translocating) monomeric flavoprotein                                                                              | +          | [6,10]  |
| <i>pflB</i>       | Pyruvate-formate lyase; catabolizes pyruvate under anoxic conditions                                                                                                                            | +          | [11,12] |
| <i>ptsG</i>       | D-Glucose-specific permease of the sugar phosphotransferase system                                                                                                                              | –          | [13]    |
| <i>sdhCDAB</i>    | Succinate dehydrogenase; oxidizes succinate to fumarate and transfers electrons to ubiquinone in the oxic respiratory chain                                                                     | –          | [6]     |
| <i>sucABCD</i>    | Succinyl-CoA synthase; catalyzes the interconversion of succinyl-CoA and succinate by means of GTP hydrolysis, both in the TCA cycle and the reductive branch                                   | –          | [14]    |
| CreBC system      |                                                                                                                                                                                                 |            |         |
| Gene              | Function(s)                                                                                                                                                                                     | Regulation | Ref.    |
| <i>pta-ackA</i>   | Phosphate acetyltransferase (Pta) catalyzes the conversion of acetyl-CoA into acetyl- <i>P</i> , whereas acetate kinase (AckA) converts acetyl- <i>P</i> into acetate, thereby forming ATP      | +          | [15]    |
| <i>talA</i>       | Transaldolase A; converts D-glyceraldehyde-3- <i>P</i> and D-sedoheptulose-7- <i>P</i> into D-fructose-6- <i>P</i> and D-erythrose-4- <i>P</i> in the non-oxidative branch of the PP pathway    | +          | [15]    |

## References

1. Lynch AS, Lin ECC (1996) Responses to molecular oxygen. In: Neidhardt FC, Curtiss III R, Ingraham JL, Lin ECC, Low KB, et al., editors. *Escherichia coli* and *Salmonella*: cellular and molecular biology, vol. 1. Washington, D.C.: ASM Press. pp. 1526-1538.
2. Salmon KA, Hung SP, Steffen NR, Krupp R, Baldi P, et al. (2005) Global gene expression profiling in *Escherichia coli* K12: effects of oxygen availability and ArcA. *J Biol Chem* 280: 15084-15096.
3. Lorca GL, Ezersky A, Lunin VV, Walker JR, Altamentova S, et al. (2007) Glyoxylate and pyruvate are antagonistic effectors of the *Escherichia coli* IclR transcriptional regulator. *J Biol Chem* 282: 16476-16491.
4. Cunningham L, Gruer MJ, Guest JR (1997) Transcriptional regulation of the aconitase genes (*acnA* and *acnB*) of *Escherichia coli*. *Microbiology* 143: 3795-3805.
5. Cotter PA, Gunsalus RP (1992) Contribution of the *fnr* and *arcA* gene products in coordinate regulation of cytochrome o and d oxidase (*cyoABCDE* and *cydAB*) genes in *Escherichia coli*. *FEMS Microbiol Lett* 70: 31-36.
6. Liu X, De Wulf P (2004) Probing the ArcA-P modulon of *Escherichia coli* by whole genome transcriptional analysis and sequence recognition profiling. *J Biol Chem* 279: 12588-12597.
7. Park SJ, Gunsalus RP (1995) Oxygen, iron, carbon, and superoxide control of the fumarase *fumA* and *fumC* genes of *Escherichia coli*: role of the *arcA*, *fnr*, and *soxR* gene products. *J Bacteriol* 177: 6255-6262.
8. Park SJ, McCabe J, Turna J, Gunsalus RP (1994) Regulation of the citrate synthase (*gltA*) gene of *Escherichia coli* in response to anaerobiosis and carbon supply: role of the *arcA* gene product. *J Bacteriol* 176: 5086-5092.
9. Li M, Ho PY, Yao S, Shimizu K (2006) Effect of *lpdA* gene knockout on the metabolism in *Escherichia coli* based on enzyme activities, intracellular metabolite concentrations and metabolic flux analysis by <sup>13</sup>C-labeling experiments. *J Biotechnol* 122: 254-266.
10. Green J, Anjum MF, Guest JR (1997) Regulation of the *ndh* gene of *Escherichia coli* by integration host factor and a novel regulator, Arr. *Microbiology* 143: 2865-2875.
11. Sawers G (1993) Specific transcriptional requirements for positive regulation of the anaerobically inducible *pfl* operon by ArcA and FNR. *Mol Microbiol* 10: 737-747.
12. Drapal N, Sawers G (1995) Promoter 7 of the *Escherichia coli* *pfl* operon is a major determinant in the anaerobic regulation of expression by ArcA. *J Bacteriol* 177: 5338-5341.
13. Shin D, Cho N, Kim YJ, Seok YJ, Ryu S (2008) Up-regulation of the cellular level of *Escherichia coli* PTS components by stabilizing reduced transcripts of the genes in response to the low oxygen level. *Biochem Biophys Res Commun* 370: 609-612.
14. Park SJ, Chao G, Gunsalus RP (1997) Aerobic regulation of the *sucABCD* genes of *Escherichia coli*, which encode  $\alpha$ -ketoglutarate dehydrogenase and succinyl coenzyme A synthetase: roles of ArcA, Fnr, and the upstream *sdhCDAB* promoter. *J Bacteriol* 179: 4138-4142.
15. Avison MB, Horton RE, Walsh TR, Bennett PM (2001) *Escherichia coli* CreBC is a global regulator of gene expression that responds to growth in minimal media. *J Biol Chem* 276: 26955-26961.
